# Supplementary material for: Structure and thermal expansion behavior of Ca4La6−xNdx(SiO4)4(PO4)2O2 apatite for nuclear waste immobilization
Source: Royal Society of Chemistry journal article supplement (doi:10.1039/c9dt04915k), 2020-01-01
Supplement: c9dt04915k1.pdf [file c9dt04915k1.pdf]

## Supporting information

# Structure and Thermal Expansion Behavior of $\text{Ca}_4\text{La}_{6-x}\text{Nd}_x(\text{SiO}_4)_4(\text{PO}_4)_2\text{O}_2$ Apatite for Nuclear Waste Immobilization

*Shan Yan, Dongyan Yang, Shuangqiang Chen, Juan Wen, Wenhao He, Shiyin Ji, Yue*

*Xia, Yinlong Wang, Liangfu Zhou, Yuhong Li\**

*School of Nuclear Science and Technology, Lanzhou University, Lanzhou 730000, China*

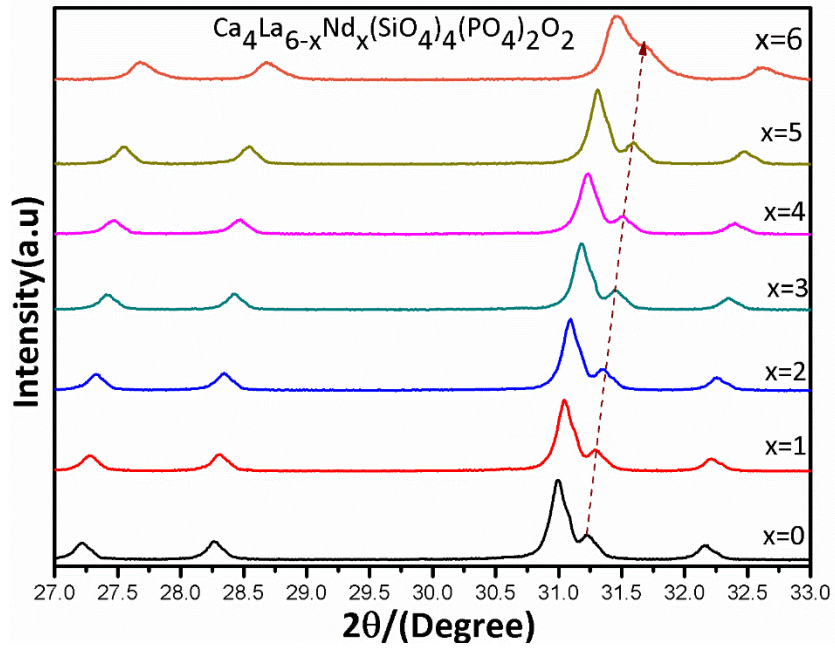

Figure S1. the local graph of powder XRD patterns of  $\text{Ca}_4\text{La}_{6-x}\text{Nd}_x(\text{SiO}_4)_4(\text{PO}_4)_2\text{O}_2$  ( $x=0, 1, 2, 3, 4, 5, 6$ ).

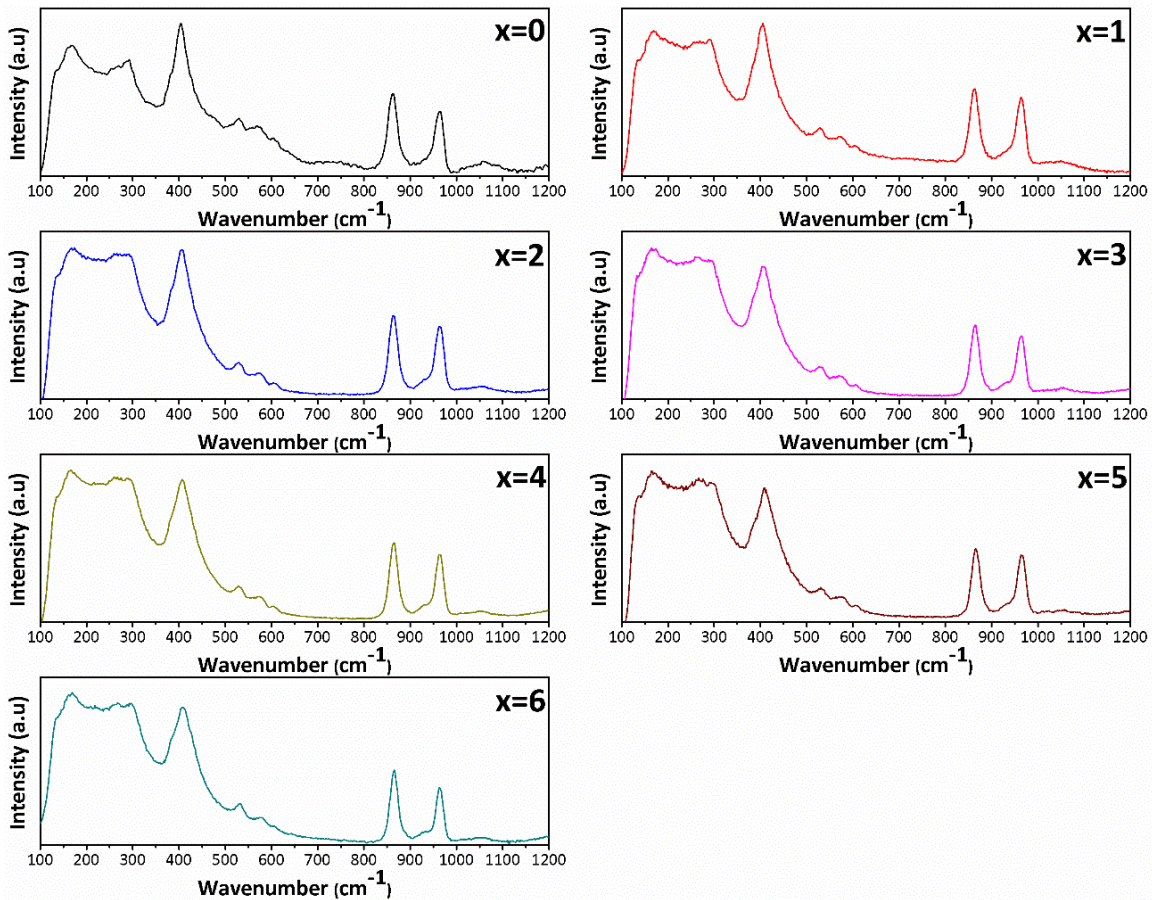

Figure S2. The Raman spectra of  $\text{Ca}_4\text{La}_{6-x}\text{Nd}_x(\text{SiO}_4)_4(\text{PO}_4)_2\text{O}_2$  ( $x = 0, 1, 2, 3, 4, 5, 6$ ) specimens excited in 532 nm.

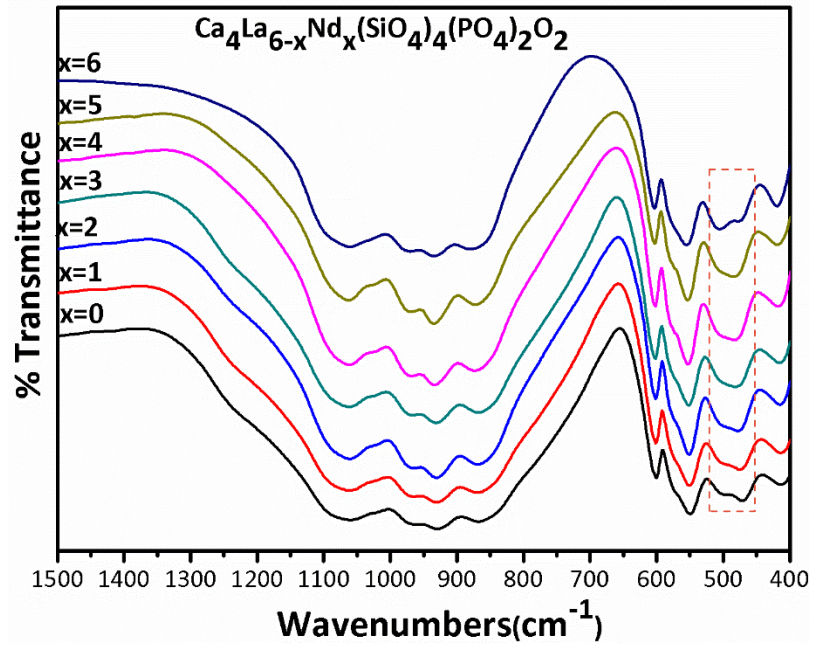

Figure S3. the FT-IR spectra of  $\text{Ca}_4\text{La}_{6-x}\text{Nd}_x(\text{SiO}_4)_4(\text{PO}_4)_2\text{O}_2$  ( $x = 0, 1, 2, 3, 4, 5, 6$ ) samples detected between 400 and 1500  $\text{cm}^{-1}$ .

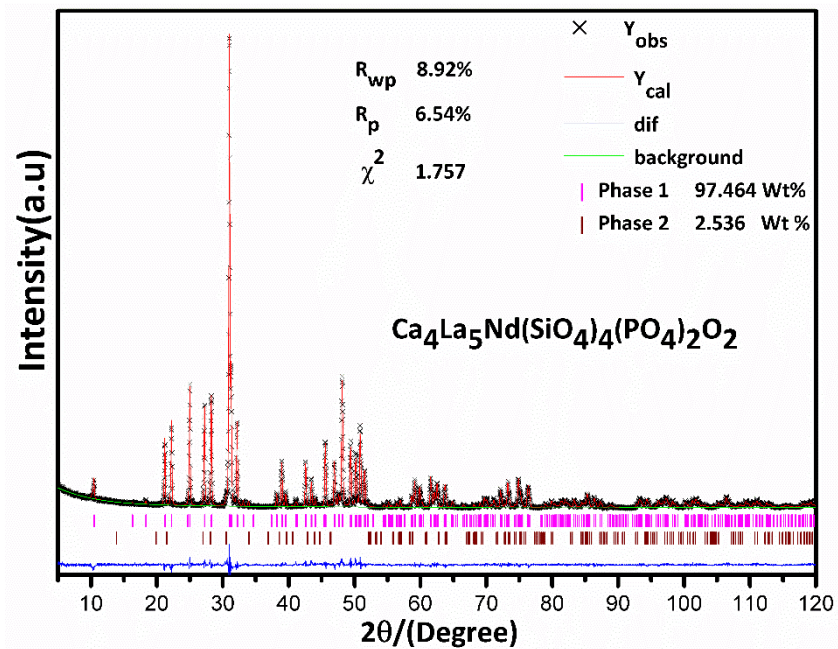

Figure S4. Rietveld fitting pattern for  $Ca_4La_5Nd(SiO_4)_4(PO_4)_2O_2$  sample.

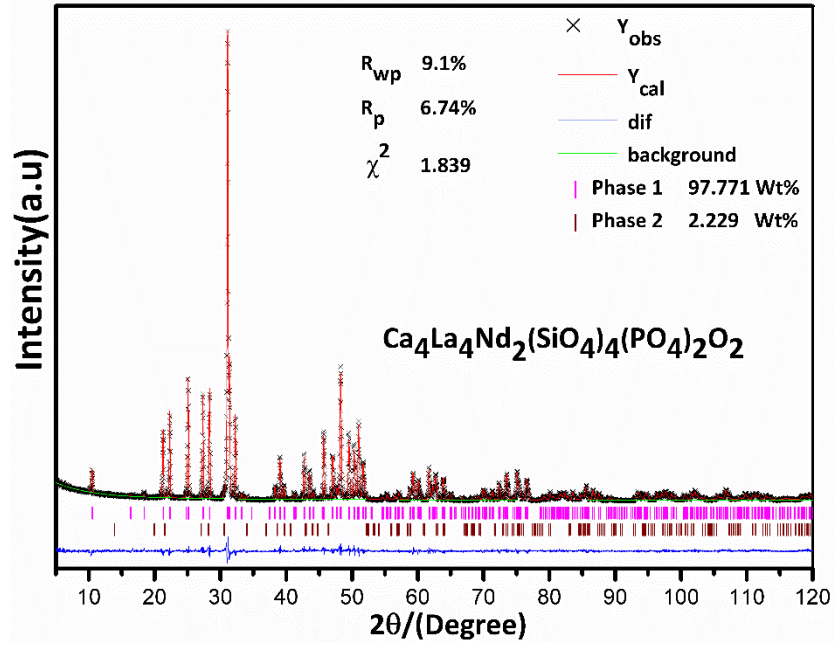

Figure S5. Rietveld fitting pattern for  $Ca_4La_4Nd_2(SiO_4)_4(PO_4)_2O_2$  sample.

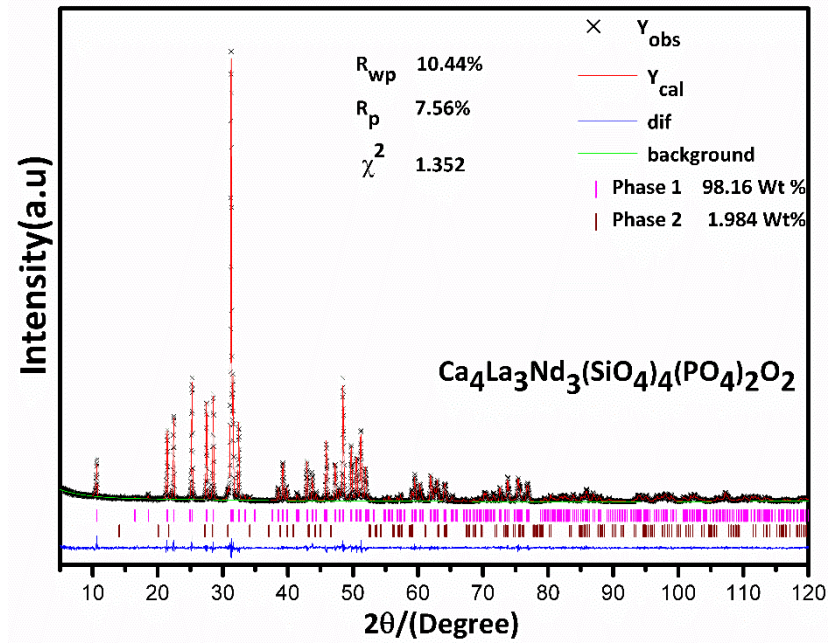

Figure S6. Rietveld fitting pattern for  $Ca_4La_3Nd_3(SiO_4)_4(PO_4)_2O_2$  sample.

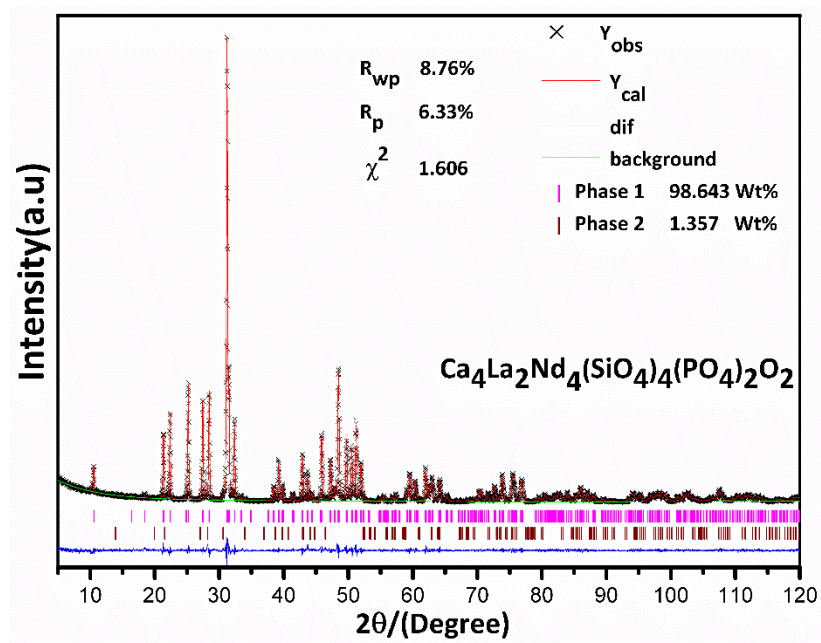

Figure S7. Rietveld fitting pattern for  $Ca_4La_2Nd_4(SiO_4)_4(PO_4)_2O_2$  sample.



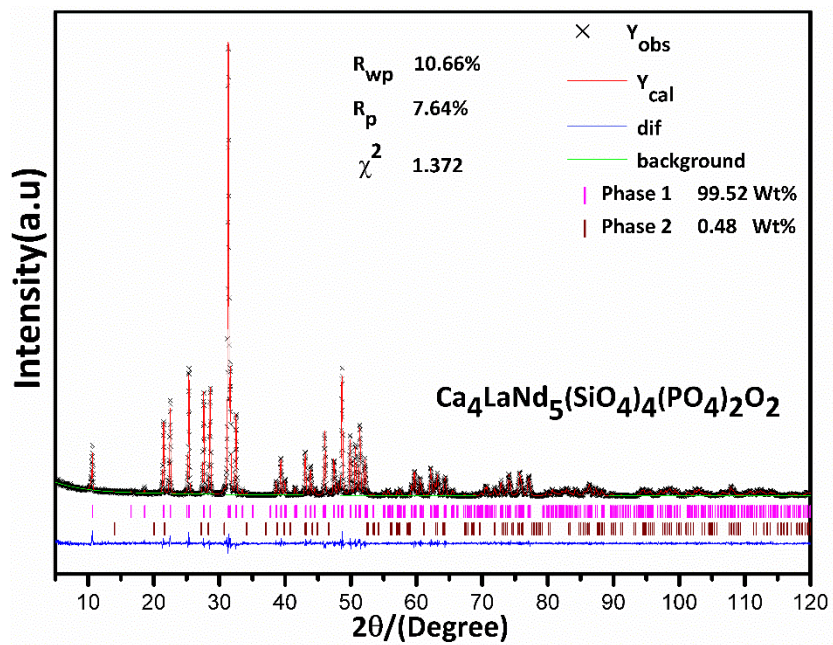

Figure S8. Rietveld fitting pattern for  $Ca_4LaNd_5(SiO_4)_4(PO_4)_2O_2$  sample.

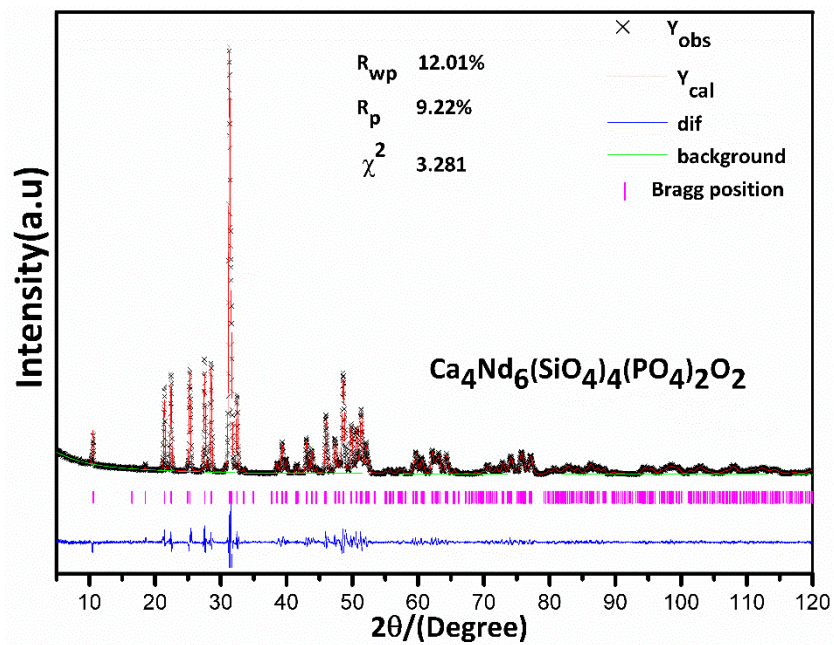

Figure S9. Rietveld fitting pattern for  $Ca_4Nd_6(SiO_4)_4(PO_4)_2O_2$  sample.

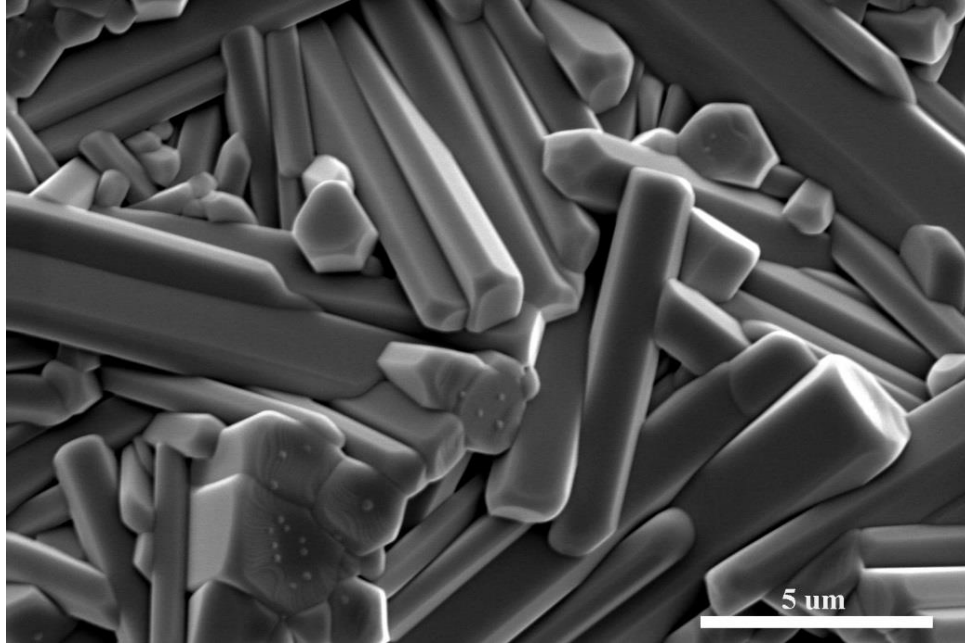

Figure S10. The scanning electron microscope (SEM) of  $\text{Ca}_4\text{Nd}_6(\text{SiO}_4)_4(\text{PO}_4)_2\text{O}_2$  sample prepared at 1600 °C

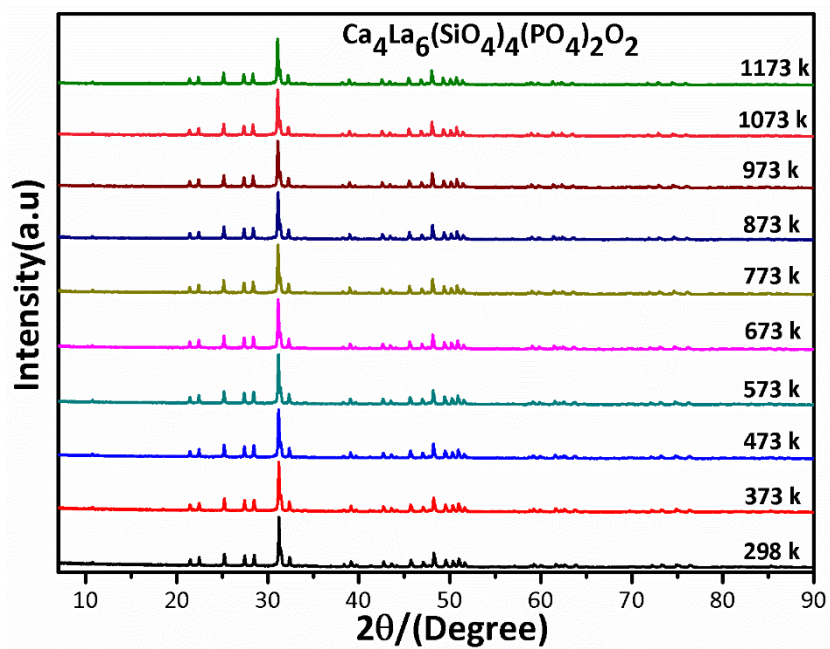

Figure S11. High temperature powder XRD patterns of  $\text{Ca}_4\text{La}_6(\text{SiO}_4)_4(\text{PO}_4)_2\text{O}_2$  sample between 298 and 1173k.

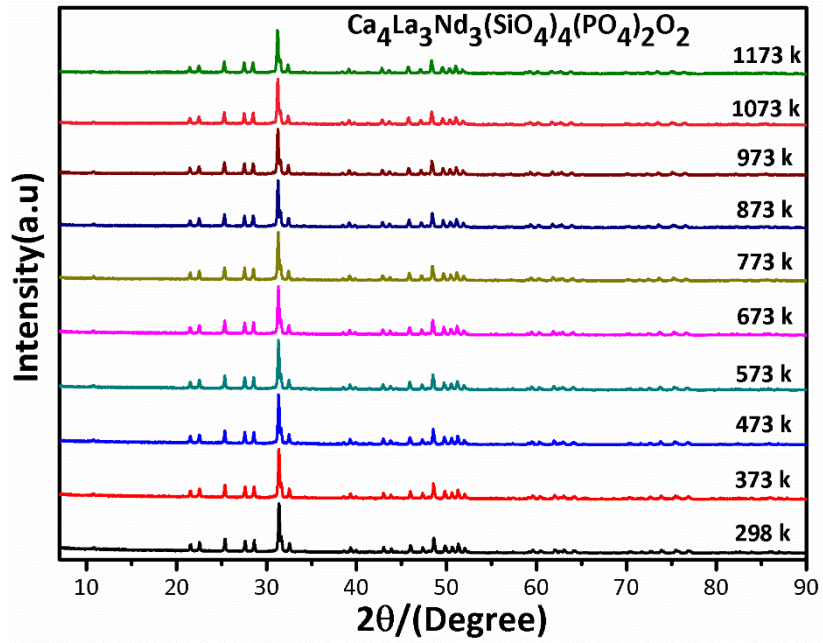

Figure S12. High temperature powder XRD patterns of  $\text{Ca}_4\text{La}_3\text{Nd}_3(\text{SiO}_4)_4(\text{PO}_4)_2\text{O}_2$  sample between 298 and 1173k.

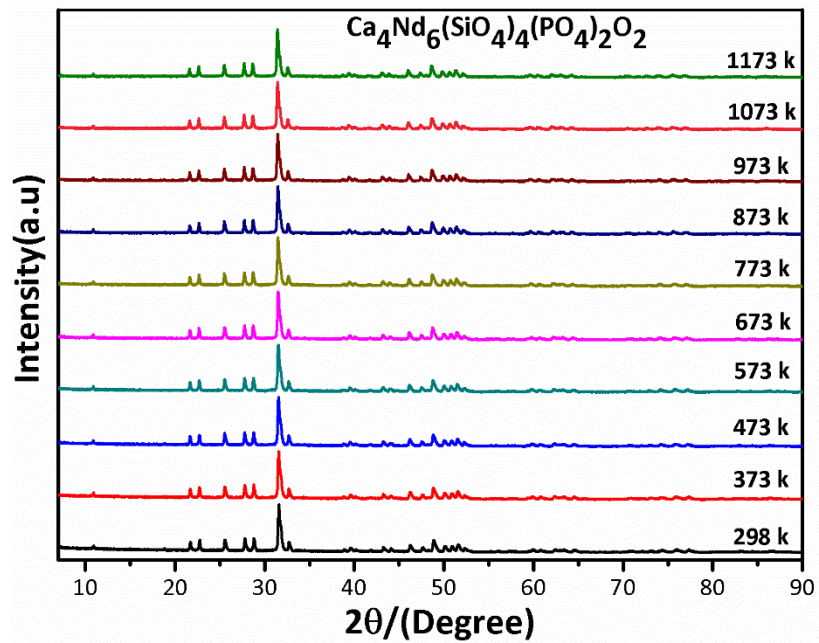

Figure S13. High temperature powder XRD patterns of  $\text{Ca}_4\text{Nd}_6(\text{SiO}_4)_4(\text{PO}_4)_2\text{O}_2$  sample between 298 and 1173k.

Table S1. The refined lattice parameters atomic positions, site occupancy, and isotropic atomic displacement parameters from powder X-ray diffraction of  $\text{Ca}_4\text{La}_{6-x}\text{Nd}_x(\text{SiO}_4)_4(\text{PO}_4)_2\text{O}_2$  ( $x = 0, 1, 2, 3, 4, 5, 6$ ) samples in  $\text{P6}_3/\text{m}$  (176) space group.

| Composition x                   | 0            | 1           | 2           | 3           | 4           | 5           | 6           |
|---------------------------------|--------------|-------------|-------------|-------------|-------------|-------------|-------------|
| a (Å)                           | 9.5998(1)    | 9.5815(1)   | 9.5626(1)   | 9.5487(1)   | 9.5278(1)   | 9.5147(1)   | 9.5045(2)   |
| c (Å)                           | 7.0886(1)    | 7.0694(1)   | 7.0506(1)   | 7.0373(1)   | 7.0184(1)   | 7.0062(1)   | 6.9983(2)   |
| Volume (Å <sup>3</sup> )        | 565.74(2)    | 562.06(1)   | 558.36(1)   | 555.67(1)   | 551.76(2)   | 549.30(2)   | 547.50(2)   |
| R <sub>wp</sub>                 | 9.04%        | 8.92%       | 9.1%        | 10.44%      | 8.76%       | 10.66%      | 12.01%      |
| R <sub>p</sub>                  | 6.65%        | 6.54%       | 6.74%       | 7.56%       | 6.33%       | 7.64%       | 9.22%       |
| $\chi^2$                        | 1.939        | 1.757       | 1.839       | 1.352       | 1.606       | 1.372       | 3.281       |
| $\text{M}_{4f,4f}(1/3, 2/3, z)$ | 0.003292(1)  | 0.001697(1) | 0.003057(1) | 0.001004(1) | 0.002190(1) | 0.000820(1) | 0.003686(1) |
| z                               |              |             |             |             |             |             |             |
| U <sub>iso</sub>                | 0.017992(1)  | 0.018318(1) | 0.019203(1) | 0.020050(1) | 0.019414(1) | 0.020839(1) | 0.014857(1) |
| Ca <sub>occupy</sub>            | 0.76354(3)   | 0.75911(3)  | 0.75468(3)  | 0.75025(3)  | 0.74582(3)  | 0.74139(3)  | 0.73696(3)  |
| La <sub>occupy</sub>            | 0.23646(3)   | 0.19705(3)  | 0.15764(3)  | 0.11823(3)  | 0.07882(3)  | 0.03941(3)  | 0           |
| Nd <sub>occupy</sub>            | 0            | 0.04384(3)  | 0.08768(3)  | 0.13152(3)  | 0.17536(3)  | 0.21920(3)  | 0.26304(3)  |
| $\text{M}_{6h,6h}(x, y, 1/4)_x$ | 0.246351(1)  | 0.245815(1) | 0.245105(1) | 0.244026(1) | 0.243715(1) | 0.242948(1) | 0.243114(1) |
| $\text{M}_{6h,6h}(x, y, 1/4)_y$ | 0.230990(1)  | 0.231276(1) | 0.231132(1) | 0.230595(1) | 0.231058(1) | 0.230562(1) | 0.231605(1) |
| U <sub>iso</sub>                | 0.011804(1)  | 0.012316(1) | 0.011576(1) | 0.012457(1) | 0.010411(1) | 0.012617(1) | 0.014452(1) |
| Ca <sub>occupy</sub>            | 0.15764(2)   | 0.16059(2)  | 0.16355(2)  | 0.16650(2)  | 0.16945(2)  | 0.17241(2)  | 0.17536(2)  |
| La <sub>occupy</sub>            | 0.84236(2)   | 0.70196(2)  | 0.56157(2)  | 0.42118(2)  | 0.28079(2)  | 0.14039(2)  | 0           |
| Nd <sub>occupy</sub>            | 0            | 0.13744(2)  | 0.27488(2)  | 0.41232(2)  | 0.54976(2)  | 0.68720(2)  | 0.82464(2)  |
| $\text{Si/P}_{6h}(x, y, 1/4)_x$ | 0.028670(1)  | 0.030225(1) | 0.028133(1) | 0.030759(1) | 0.029600(1) | 0.031077(1) | 0.030626(1) |
| $\text{Si/P}_{6h}(x, y, 1/4)_y$ | 0.4077520(1) | 0.406969(1) | 0.406043(1) | 0.402822(1) | 0.404972(1) | 0.402400(1) | 0.403019(1) |
| U <sub>iso</sub>                | 0.015018(1)  | 0.015346(1) | 0.015936(1) | 0.018515(1) | 0.015704(1) | 0.016746(1) | 0.018997(1) |
| $\text{O1}_{6h}(x, y, 1/4)_x$   | 0.492079(1)  | 0.494547(1) | 0.489717(1) | 0.494914(1) | 0.492930(1) | 0.491165(1) | 0.492332(1) |
| $\text{O1}_{6h}(x, y, 1/4)_y$   | 0.156819(1)  | 0.154608(1) | 0.157917(1) | 0.152915(1) | 0.154915(1) | 0.152905(1) | 0.153181(1) |
| U <sub>iso</sub>                | 0.000280(1)  | 0.008125(1) | 0.007301(1) | 0.013631(1) | 0.006791(1) | 0.010966(1) | 0.015623(1) |
| $\text{O2}_{6h}(x, y, 1/4)_x$   | 0.139030(1)  | 0.135223(1) | 0.133189(1) | 0.128848(1) | 0.131162(1) | 0.124961(1) | 0.126440(1) |
| $\text{O2}_{6h}(x, y, 1/4)_y$   | 0.598758(1)  | 0.598713(1) | 0.598190(1) | 0.595574(1) | 0.598032(1) | 0.595869(1) | 0.596669(1) |
| U <sub>iso</sub>                | 0.015816(1)  | 0.013862(1) | 0.012678(1) | 0.022898(1) | 0.015693(1) | 0.016448(1) | 0.017732(1) |
| $\text{O3}_{12i}(x, y, z)_x$    | 0.085774(1)  | 0.085489(1) | 0.085412(1) | 0.086625(1) | 0.086359(1) | 0.086085(1) | 0.089737(1) |
| $\text{O3}_{12i}(x, y, z)_y$    | 0.345350(1)  | 0.342600(1) | 0.341289(1) | 0.337316(1) | 0.341053(1) | 0.336099(1) | 0.342431(1) |
| $\text{O3}_{12i}(x, y, z)_z$    | 0.070677(1)  | 0.070502(1) | 0.071902(1) | 0.070801(1) | 0.069409(1) | 0.069565(1) | 0.067906(1) |
| U <sub>iso</sub>                | 0.014541(1)  | 0.006960(1) | 0.018439(1) | 0.018331(1) | 0.008517(1) | 0.018893(1) | 0.016092(1) |
| $\text{O4}_{2a}(0, 0, 1/4)$     |              |             |             |             |             |             |             |
| U <sub>iso</sub>                | 0.023588(1)  | 0.020444(1) | 0.015745(1) | 0.015242(1) | 0.017955(1) | 0.016307(1) | 0.017937(1) |

Table S2. The selected bond lengths and Bond-Valence Sums (BVS) of  $\text{Ca}_4\text{La}_{6-x}\text{Nd}_x(\text{SiO}_4)_4(\text{PO}_4)_2\text{O}_2$  ( $x = 0, 1, 2, 3, 4, 5, 6$ ) samples after refinement analyses.

| Composition x             | 0         | 1         | 2         | 3         | 4         | 5         | 6         |
|---------------------------|-----------|-----------|-----------|-----------|-----------|-----------|-----------|
| Si/P — O(1)               | 1.5543(1) | 1.5529(1) | 1.5512(1) | 1.5475(1) | 1.5415(1) | 1.5390(1) | 1.5362(1) |
| Si/P — O(2)               | 1.5944(1) | 1.5935(1) | 1.5936(1) | 1.5940(1) | 1.5937(1) | 1.5944(1) | 1.5940(1) |
| Si/P — O(3)*2             | 1.6136(1) | 1.6117(1) | 1.6123(1) | 1.6124(1) | 1.6122(1) | 1.6125(1) | 1.6108(1) |
| <Si/P — O >               | 1.593975  | 1.59245   | 1.59235   | 1.591575  | 1.5899    | 1.5896    | 1.58795   |
| M <sub>4f</sub> — O(1) *3 | 2.4625(3) | 2.4483(3) | 2.4540(4) | 2.4397(3) | 2.4389(4) | 2.4407(4) | 2.4478(4) |
| M <sub>4f</sub> — O(2)*3  | 2.3972(3) | 2.4233(3) | 2.4228(3) | 2.4532(3) | 2.4297(3) | 2.4692(3) | 2.4439(3) |
| M <sub>4f</sub> — O(3)*3  | 2.8390(4) | 2.8539(2) | 2.8567(5) | 2.8759(3) | 2.8430(4) | 2.8739(4) | 2.8149(5) |
| < M <sub>4f</sub> — O >   | 2.566233  | 2.575167  | 2.577833  | 2.5896    | 2.570533  | 2.5946    | 2.568867  |
| M <sub>6h</sub> — O(1)    | 2.7841(1) | 2.8231(1) | 2.7567(1) | 2.8401(1) | 2.8084(1) | 2.8051(1) | 2.8164(1) |
| M <sub>6h</sub> — O(2)    | 2.5713(1) | 2.5329(1) | 2.5168(1) | 2.5045(1) | 2.4934(1) | 2.4625(1) | 2.4565(1) |
| M <sub>6h</sub> — O(3)*2  | 2.6248(1) | 2.5974(1) | 2.5743(1) | 2.5336(1) | 2.5542(1) | 2.5165(1) | 2.5287(1) |
| M <sub>6h</sub> — O(3)*2  | 2.4259(1) | 2.4136(1) | 2.4157(1) | 2.3992(1) | 2.3932(1) | 2.3890(1) | 2.3858(1) |
| M <sub>6h</sub> — O(4)    | 2.2948(1) | 2.2888(1) | 2.2800(1) | 2.2687(1) | 2.2642(1) | 2.2550(1) | 2.2580(1) |
| < M <sub>6h</sub> — O >   | 2.535942  | 2.523829  | 2.504786  | 2.496986  | 2.4944    | 2.476229  | 2.479986  |
| Ca <sub>4f</sub> BVS      | 2.00812   | 1.96402   | 1.95068   | 1.89934   | 1.97778   | 1.86464   | 1.94776   |
| La <sub>4f</sub> BVS      | 3.36448   | 3.3035    | 3.28484   | 3.21181   | 3.32448   | 3.16517   |           |
| Nd <sub>4f</sub> BVS      |           | 2.94585   | 2.92585   | 2.84884   | 2.96649   | 2.79679   | 2.92146   |
| Ca <sub>6h</sub> BVS      | 1.63415   | 1.69683   | 1.75604   | 1.8252    | 1.83308   | 1.93144   | 1.90576   |
| La <sub>6h</sub> BVS      | 2.72459   | 2.80975   | 2.89601   | 2.98483   | 2.99552   | 3.12917   |           |
| Nd <sub>6h</sub> BVS      |           | 2.5451    | 2.6369    | 2.73764   | 2.74946   | 2.89699   | 2.85848   |



Table S3. The crystal data, thermal expansion coefficients and anisotropic parameters ( $\alpha_a/\alpha_c$ ) of  $\text{Ca}_4\text{La}_6(\text{SiO}_4)_4(\text{PO}_4)_2\text{O}_2$  material in the temperature range of 298-1173 K.

| T(K)                                                                                | a (Å)    | $\alpha_a \cdot 10^6(\text{K}^{-1})$ | c (Å)    | $\alpha_c \cdot 10^6(\text{K}^{-1})$ | $\alpha_a/\alpha_c$ | V(Å <sup>3</sup> ) | $\alpha_v \cdot 10^6(\text{K}^{-1})$ |
|-------------------------------------------------------------------------------------|----------|--------------------------------------|----------|--------------------------------------|---------------------|--------------------|--------------------------------------|
| <b><math>\text{Ca}_4\text{La}_6(\text{PO}_4)_4(\text{SiO}_4)_2\text{O}_2</math></b> |          |                                      |          |                                      |                     |                    |                                      |
| 298                                                                                 | 9.595942 | 9.017287                             | 7.086222 | 6.990531                             | 1.289929            | 565.094            | 25.05781                             |
| 373                                                                                 | 9.60277  | 8.778117                             | 7.090028 | 6.8225961                            | 1.286624            | 566.202            | 24.42984                             |
| 473                                                                                 | 9.610834 | 8.459224                             | 7.094772 | 6.598684                             | 1.281956            | 567.533            | 23.59255                             |
| 573                                                                                 | 9.618629 | 8.140331                             | 7.099213 | 6.374771                             | 1.27696             | 568.81             | 22.75526                             |
| 673                                                                                 | 9.626481 | 7.821438                             | 7.104156 | 6.150859                             | 1.271601            | 570.136            | 21.91797                             |
| 773                                                                                 | 9.634238 | 7.502544                             | 7.108468 | 5.926946                             | 1.265836            | 571.402            | 21.08068                             |
| 873                                                                                 | 9.640447 | 7.183651                             | 7.111515 | 5.703033                             | 1.259619            | 572.383            | 20.24339                             |
| 973                                                                                 | 9.647381 | 6.864758                             | 7.11611  | 5.479121                             | 1.252894            | 573.578            | 19.4061                              |
| 1073                                                                                | 9.654068 | 6.545865                             | 7.119841 | 5.255208                             | 1.245596            | 574.674            | 18.56881                             |
| 1173                                                                                | 9.660237 | 6.226972                             | 7.123816 | 5.031296                             | 1.237648            | 575.73             | 17.73152                             |

Table S4. The crystal data, thermal expansion coefficients and anisotropic parameters ( $\alpha_a/\alpha_c$ ) of  $\text{Ca}_4\text{La}_3\text{Nd}_3(\text{SiO}_4)_4(\text{PO}_4)_2\text{O}_2$  material in the temperature range of 298-1173 K.

| T(K)                                                                                           | a (Å)    | $\alpha_a \times 10^6 (\text{K}^{-1})$ | c (Å)    | $\alpha_c \times 10^6 (\text{K}^{-1})$ | $\alpha_a/\alpha_c$ | V(Å <sup>3</sup> ) | $\alpha_v \times 10^6 (\text{K}^{-1})$ |
|------------------------------------------------------------------------------------------------|----------|----------------------------------------|----------|----------------------------------------|---------------------|--------------------|----------------------------------------|
| <b><math>\text{Ca}_4\text{La}_3\text{Nd}_3(\text{PO}_4)_4(\text{SiO}_4)_2\text{O}_2</math></b> |          |                                        |          |                                        |                     |                    |                                        |
| 298                                                                                            | 9.539958 | 8.414846                               | 7.030376 | 6.901902                               | 1.219207            | 554.118            | 23.756346                              |
| 373                                                                                            | 9.546563 | 8.240396                               | 7.034348 | 6.766088                               | 1.217897            | 555.199            | 23.290260                              |
| 473                                                                                            | 9.553801 | 8.007795                               | 7.038675 | 6.585003                               | 1.216066            | 556.383            | 22.668811                              |
| 573                                                                                            | 9.561501 | 7.775195                               | 7.043566 | 6.403918                               | 1.214131            | 557.668            | 22.047362                              |
| 673                                                                                            | 9.569093 | 7.542594                               | 7.048214 | 6.222832                               | 1.212084            | 558.922            | 21.4259132                             |
| 773                                                                                            | 9.5753   | 7.309993                               | 7.051809 | 6.041747                               | 1.209914            | 559.933            | 20.8044642                             |
| 873                                                                                            | 9.583012 | 7.077393                               | 7.056283 | 5.860662                               | 1.20761             | 561.191            | 20.1830152                             |
| 973                                                                                            | 9.589323 | 6.844792                               | 7.060413 | 5.679576                               | 1.205159            | 562.259            | 19.561567                              |
| 1073                                                                                           | 9.5956   | 6.612192                               | 7.064185 | 5.498491                               | 1.202547            | 563.296            | 18.940118                              |
| 1173                                                                                           | 9.60211  | 6.379591                               | 7.068286 | 5.317406                               | 1.199756            | 564.388            | 18.318669                              |

Table S5. The crystal data, thermal expansion coefficients and anisotropic parameters ( $\alpha_a/\alpha_c$ ) of  $\text{Ca}_4\text{Nd}_6(\text{SiO}_4)_4(\text{PO}_4)_2\text{O}_2$  material in the temperature range of 298-1173 K.

| T(K)                                                                                | a (Å)    | $\alpha_a \cdot 10^6 (\text{K}^{-1})$ | c (Å)    | $\alpha_c \cdot 10^6 (\text{K}^{-1})$ | $\alpha_a/\alpha_c$ | V(Å <sup>3</sup> ) | $\alpha_v \cdot 10^6 (\text{K}^{-1})$ |
|-------------------------------------------------------------------------------------|----------|---------------------------------------|----------|---------------------------------------|---------------------|--------------------|---------------------------------------|
| <b><math>\text{Ca}_4\text{Nd}_6(\text{PO}_4)_4(\text{SiO}_4)_2\text{O}_2</math></b> |          |                                       |          |                                       |                     |                    |                                       |
| 298                                                                                 | 9.50071  | 8.75291                               | 6.998637 | 6.661747                              | 1.313906            | 547.087            | 24.18698                              |
| 373                                                                                 | 9.508645 | 8.448338                              | 7.003143 | 6.438064                              | 1.312248            | 548.354            | 23.36922                              |
| 473                                                                                 | 9.515563 | 8.042243                              | 7.007056 | 6.13982                               | 1.30985             | 549.459            | 22.27887                              |
| 573                                                                                 | 9.523204 | 7.636147                              | 7.011481 | 5.841576                              | 1.307207            | 550.689            | 21.18852                              |
| 673                                                                                 | 9.530037 | 7.230051                              | 7.015135 | 5.543332                              | 1.304279            | 551.767            | 20.09817                              |
| 773                                                                                 | 9.537024 | 6.823955                              | 7.018915 | 5.245089                              | 1.301018            | 552.874            | 19.00782                              |
| 873                                                                                 | 9.543005 | 6.417859                              | 7.022811 | 4.946845                              | 1.297364            | 553.875            | 17.91747                              |
| 973                                                                                 | 9.548056 | 6.011763                              | 7.0254   | 4.648601                              | 1.293241            | 554.666            | 16.82712                              |
| 1073                                                                                | 9.55421  | 5.605667                              | 7.028605 | 4.350357                              | 1.288553            | 555.635            | 15.73677                              |
| 1173                                                                                | 9.560196 | 5.199571                              | 7.032516 | 4.052113                              | 1.283175            | 556.641            | 14.64642                              |
